# Supplementary material
Source: MDPI journal article supplement (https://www.mdpi.com/2079-6412/12/9/1314)
Supplement: s1 [file s1 › coatings-1805473-supplementary.pdf]

Supplementary

# Effects of the IR Drop on the Electrochemical Corrosion of X80 Pipeline Steel in Different Solutions

Yunlong Bai <sup>1,2,†</sup>, Jin Xu <sup>1,2,3,†,\*</sup>, Boxin Wei <sup>1,2</sup> and Cheng Sun <sup>1,2,3,\*</sup>

<sup>1</sup> School of Materials Science and Engineering, University of Science and Technology of China, Shenyang 110016, China

<sup>2</sup> Institute of Metal Research, Chinese Academy of Sciences, Shenyang 110016, China

<sup>3</sup> Liaoning Shenyang Soil and Atmosphere Material Corrosion National Observation and Research Station, Shenyang 110016, China

† These authors contributed equally.

\* Correspondence: xujin@imr.ac.cn (J.X.), chengsun@imr.ac.cn (C.S.)

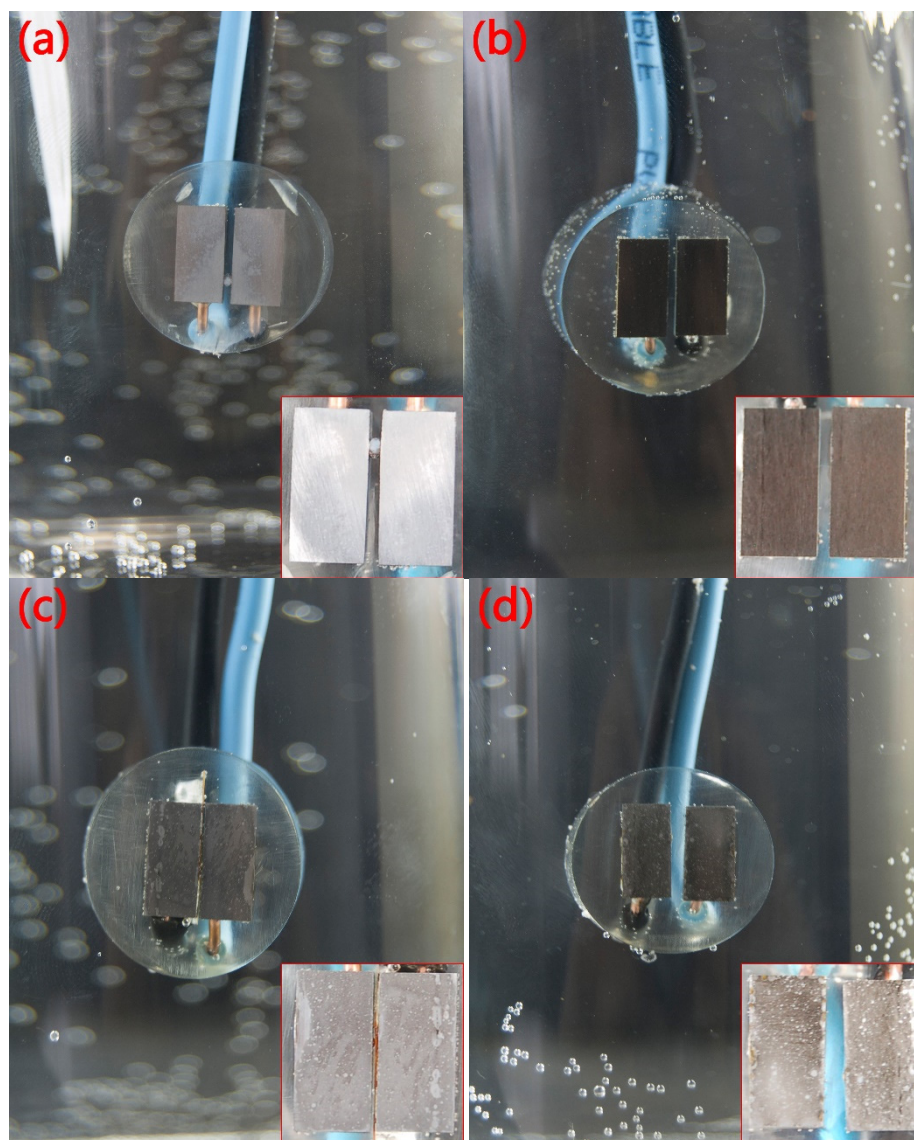

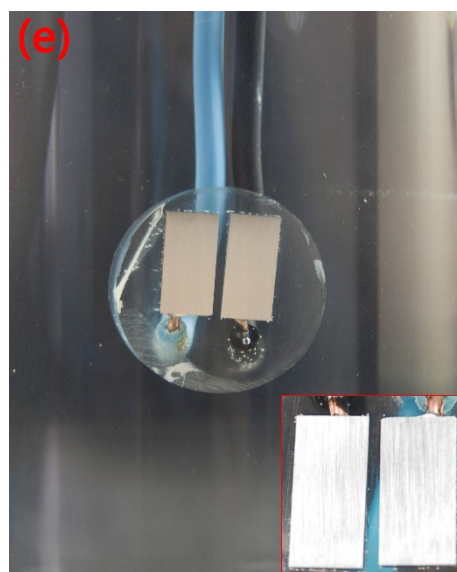

**Figure S1.** Optical pictures in five solutions (HCl (a), H<sub>2</sub>SO<sub>4</sub> (b), NaCl (c), Na<sub>2</sub>SO<sub>4</sub> (d) and NaOH (e)) after immersing for 2 h, and macrographs of coupons taken out of the solutions in the red-color squares.
